# Supplementary material
Source: PubMed Central journal article supplement (PMC7356755)
Supplement: ONCO-25-572-s001.pdf [file ONCO-25-572-s001.pdf]

Supplemental Table for:

Abnormal pre-treatment liver function tests are associated with discontinuation of PRRT in a U.S.-based neuroendocrine tumor cohort

Bryson Katona et al.

**Supplemental Table 1: Adverse effects observed with PRRT (N = 149 sessions)**

| Adverse effect during infusion                  | Occurrences |
|-------------------------------------------------|-------------|
| Nausea                                          | 21 (14%)    |
| Vomiting                                        | 3 (2%)      |
| Hemodynamic change                              | 2 (1%)      |
| Dizziness                                       | 1 (1%)      |
| Flushing                                        | 2 (1%)      |
| Adverse effect between PRRT sessions            |             |
| Fatigue                                         | 64 (43%)    |
| Nausea                                          | 28 (19%)    |
| Increase in carcinoid-syndrome related symptoms | 20 (13%)    |
| Vomiting                                        | 6 (4%)      |
| Abdominal pain                                  | 12 (8%)     |
| Body pain                                       | 8 (5%)      |
| Loss of appetite                                | 11 (7%)     |
| Mood disorder                                   | 5 (3%)      |
| Dizziness                                       | 3 (2%)      |
| Increased edema/ascites                         | 7 (4%)      |
| Hair loss                                       | 3 (2%)      |
| Small bowel obstruction                         | 1 (1%)      |
